# Supplementary material
Source: PubMed Central journal article supplement (PMC3503502)

## SUPPLEMENTARY DATA

FIG. S1. Expression of *Arath;WEE1*, and *ACT2* in arabidopsis seedlings and root tips: clear expression of both genes is seen in root tips. Loading: 100 bp ladder, seedling (S), root tips (R), water (W). PCR was performed for *Arath;WEE1* using primers and conditions as described in Sorrell *et al.* (2002).

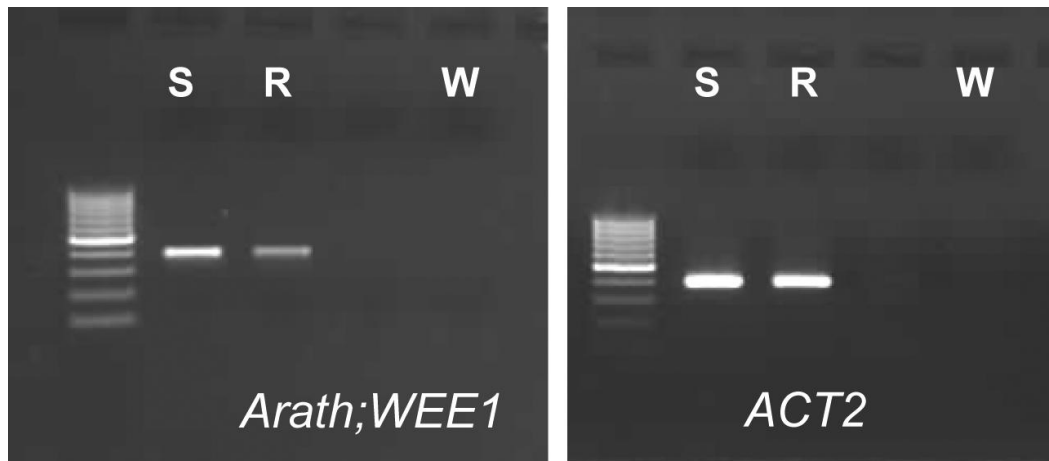

Supplement: supp_mcs223_mcs223supp.pdf [file supp_mcs223_mcs223supp.pdf]
